# Supplementary material
Source: PubMed Central journal article supplement (PMC8082696)
Supplement: mmc1.pdf [file mmc1.pdf]

**Structure, Volume 29**

**Supplemental Information**

**A monoclonal antibody against staphylococcal  
enterotoxin B superantigen inhibits**

**SARS-CoV-2 entry *in vitro***

**Mary Hongying Cheng, Rebecca A. Porritt, Magali Noval Rivas, James M. Krieger, Asli Beyza Ozdemir, Gustavo Garcia Jr., Vaithilingaraja Arumugaswami, Bettina C. Fries, Moshe Arditi, and Ivet Bahar**

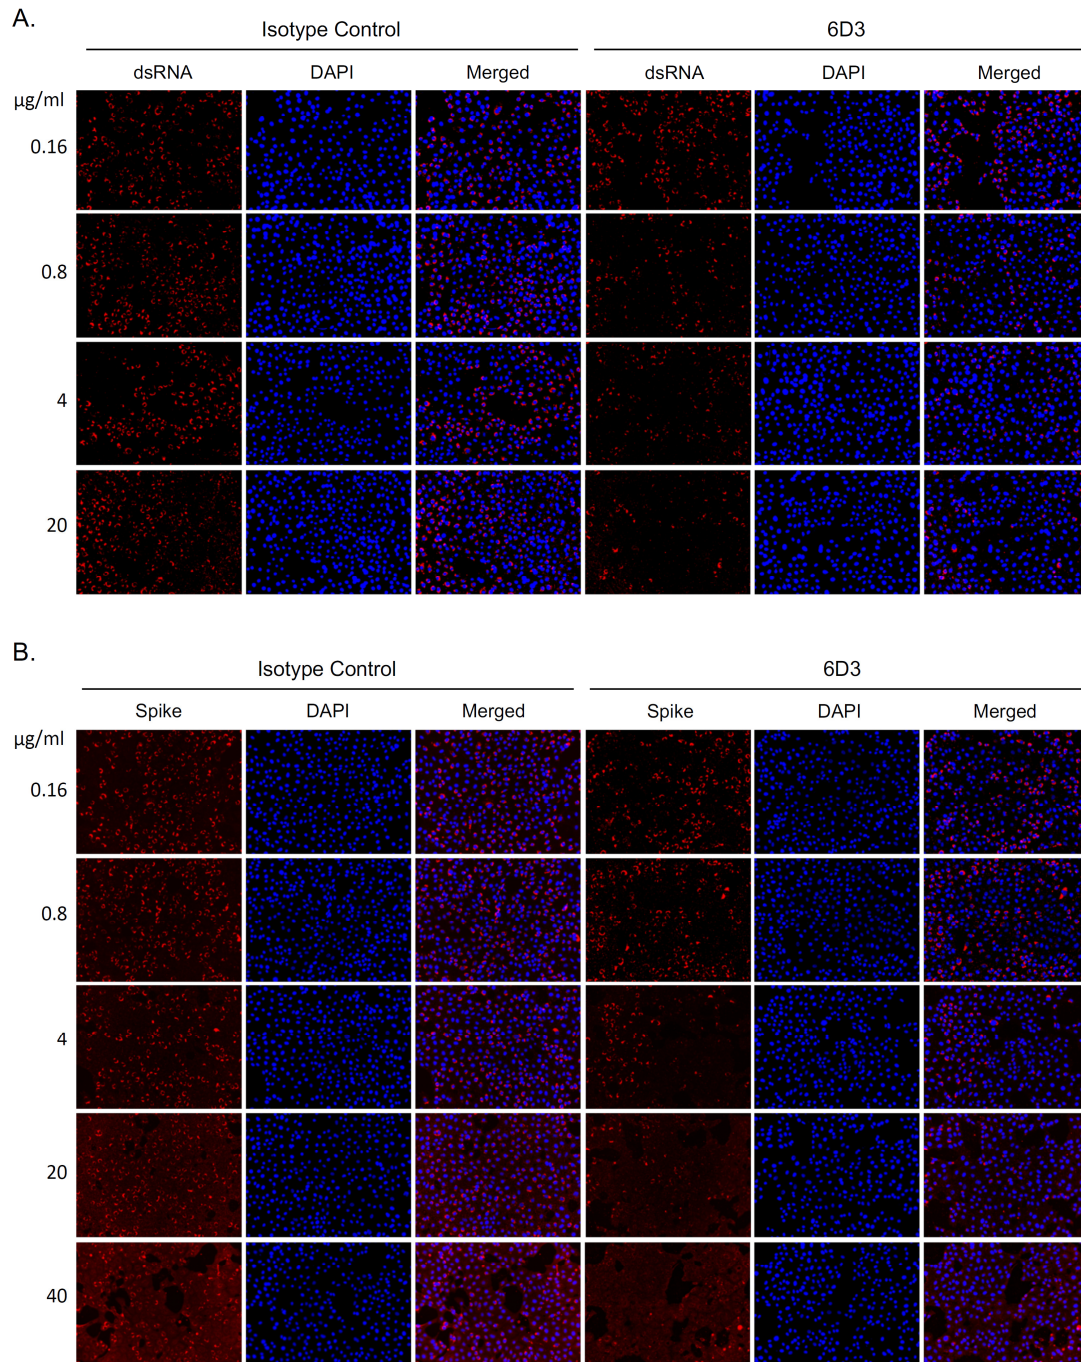

**Figure S1: Monoclonal antibody 6D3 prevents SARS-CoV-2 infection, Related to Figure 4.**

6D3 or isotype control antibodies (at indicated concentrations) were incubated with virus (100 PFU/well) for 1 hour at room temperature before addition to Vero-E6 cells ( $5 \times 10^3$  cells/well). 48 hours post infection cells were fixed and stained for dsRNA or SARS-CoV-2 spike protein. **(A)** Representative fluorescence images of 6D3 mediated inhibition of virus infection as measured by dsRNA staining. **(B)** Representative fluorescence images of 6D3 mediated inhibition of virus infection as measured by SARS-CoV-2 spike staining.

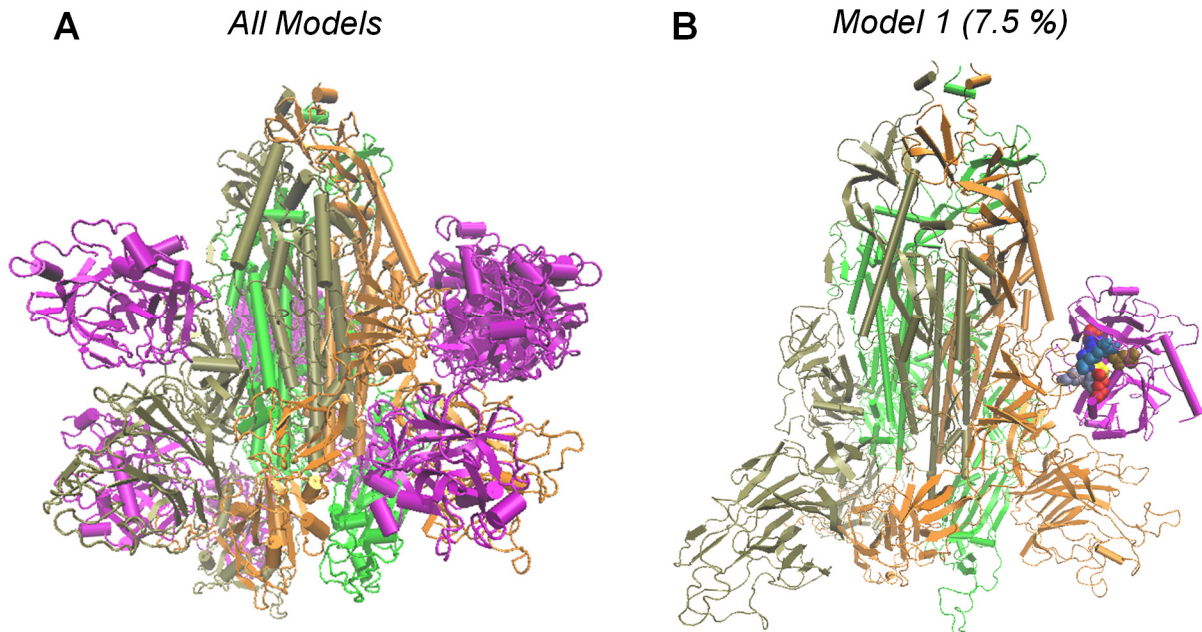

**Figure S2:** Binding of TMPRSS2 to the SARS-CoV-2 Spike (S) protein yields an ensemble of conformers including one where the protease binds to the PRRA insert, Related to Figure 5A.

(A) Overlay of models generated by the protein docking software ClusPro(Kozakov et al., 2017). The three subunits of the S protein are colored *tan*, *orange* and *green*; alternative poses of TMPRSS2 are shown in *magenta*. (B) Model 1 where TMPRSS2 catalytic residues are positioned in close proximity of the S1/S2 cleavage site. Three basic residues, R682, R683, and R685 from the S protein, are shown as van der Waals (vdW) balls in different shades of *blue*; the acidic residues of TMPRSS2 which form salt bridges with these three basic residues are displayed in *red* vdW balls with catalytic residue D345 in a *darker red* and catalytic serine residue S441 is shown as *yellow* vdW balls. *Model 1*, found to be most favorable energetically, is shown in **Figure 5A**.

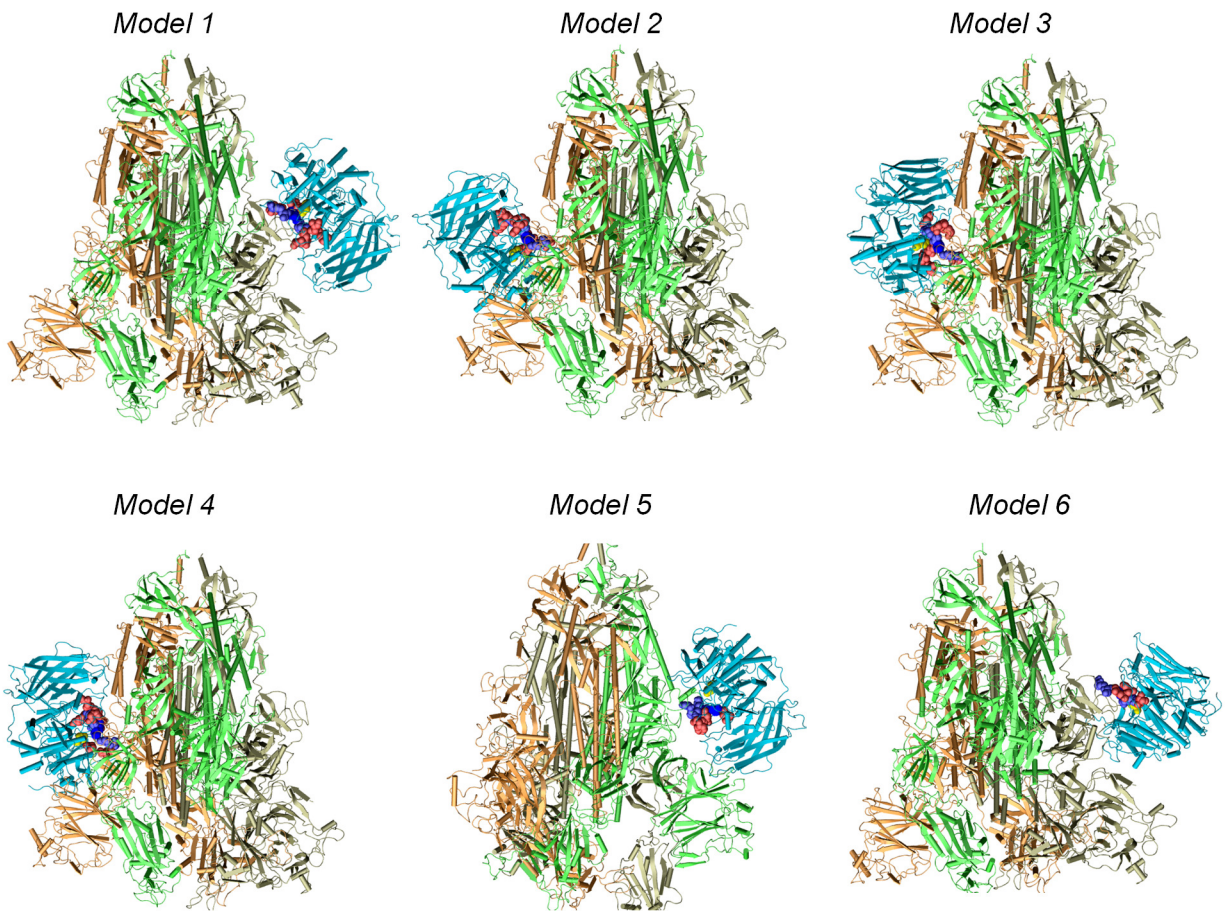

**Figure S3: Structural models generated for SARS-CoV-2 S protein complexed with furin, Related to Figure 5B.**

Six models, labeled *Model 1* to *Model 6*, representative of clusters formed by top-ranking conformers are displayed. In all models, the catalytic residues (D153, H194 and S368) of furin are in close proximity to the cleavage site  ${}_{685}\text{RS}_{686}$  of spike. The subunits from the S protein are colored *tan*, *orange* and *green*; and furin is in *cyan* cartoons. Three basic residues R682, R683, and R685 from spike are shown in *blue* vdW representation; the acidic residues which form salt bridges with these three basic residues from spike are displayed in *red* vdW balls. Note that furin has multiple acidic residues that form intermolecular salt bridges in multiple poses: D153, D154, E236, D258, D264, D306, and E331, and the close proximity of the S1/S2 site is highly favorable, both energetically and entropically. *Model 5*, found to be most favorable energetically, is shown in **Figure 5B**.

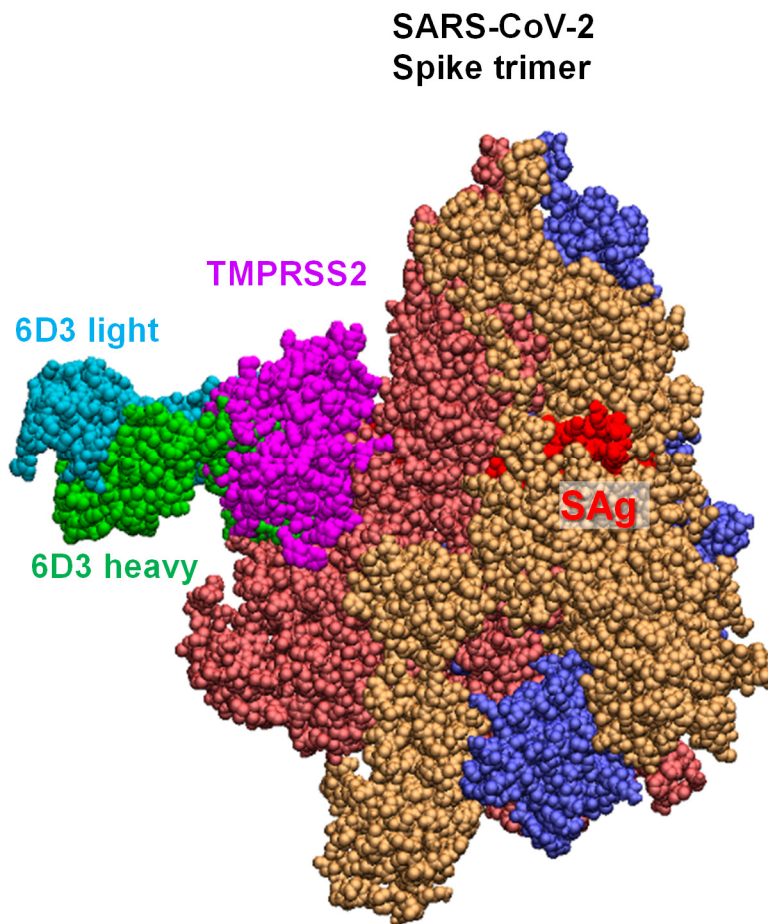

**Figure S4:** Antibody 6D3 and TMPRSS2 compete for the same binding site on SARS-CoV-2 spike protein, Related to [Figure 2](#) and [Figure 5](#).

The figure shows the overlay of the structural models generated for spike-TMPRSS2 and spike-6D3 complexes, which illustrates how TMPRSS2 spatially overlaps with the variable domains (not seen, eclipsed by TMPRSS2) of 6D3. The diagram is generated by superposing the S protein of the complexes predicted *in silico*. Similar results were found for the spike-furin complex (not shown). The three S subunits are colored *blue/violet*, *brick* and *dark orange*, with the SAg region colored *red* (visible for the *orange* monomer only).

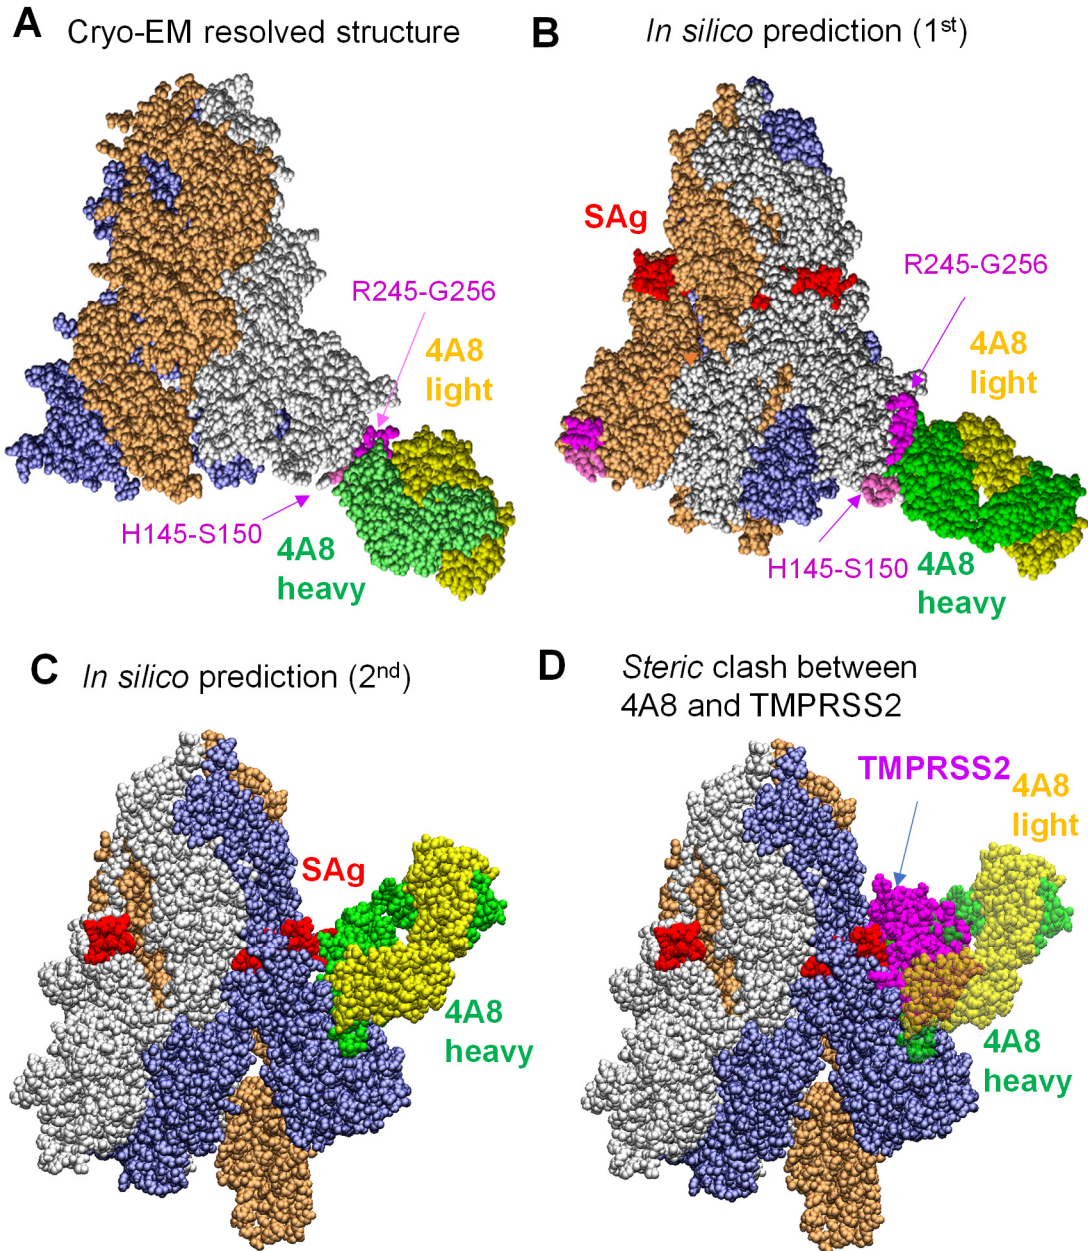

**Figure S5: Examination of binding characteristics of SARS-CoV-2-neutralizing mAbs 4A8, Related to Figure 5 and Figure 6.**

(A) Cryo-EM structure (PDB: 7C2L) (Chi et al., 2020); (B-C) Energetically most favorable conformers predicted for the S protein-4A8 complex. The former resembles the cryo-EM structure, involving the same segment, R245-G256, at the binding epitope of S. In the latter case, the viral SAg-like region which also overlaps with the S1/S2 cleavage site, serves as the 4A8-binding epitope. (D) Competition between 4A8 and TMRPSS2 for binding to the S1/S2 cleavage site, based on the overlap between the binding poses of these two substrates. The diagram is generated by superposing the S protein of the two complexes predicted *in silico*.
